# Supplementary figures and images for: Selenocyanobenziodoxolone: a practical electrophilic selenocyanation reagent and its application for solid-state synthesis of α-carbonyl selenocyanates
Source: Royal Society of Chemistry journal article supplement (doi:10.1039/c9qo00358d), 2019-01-01

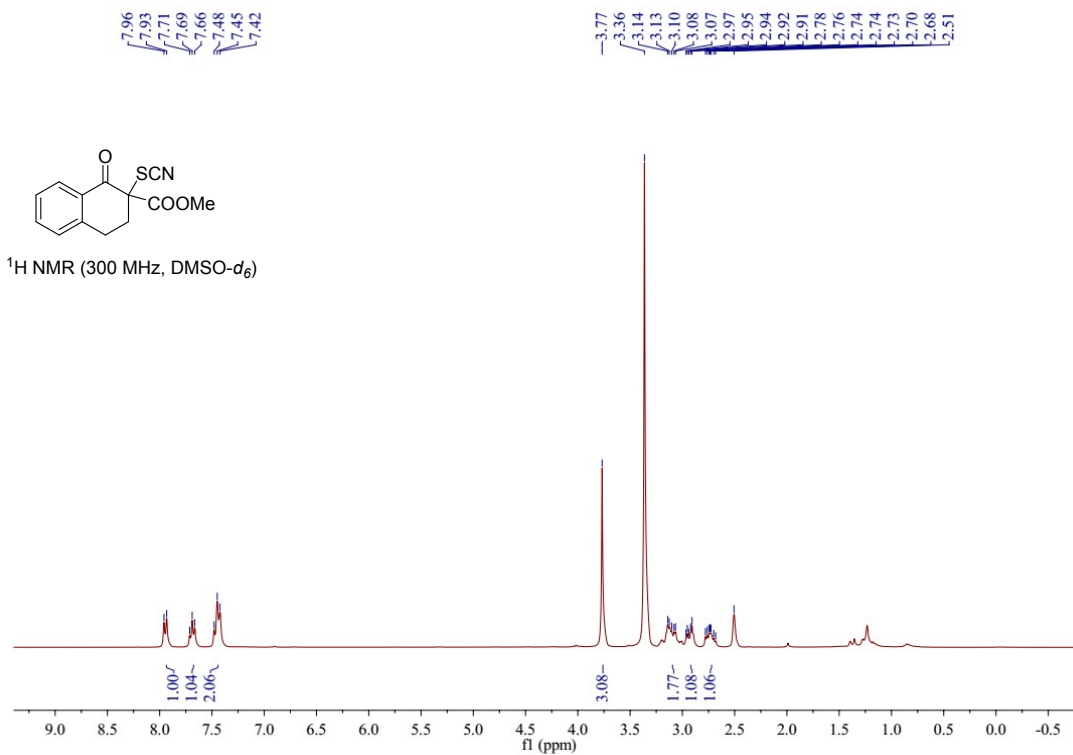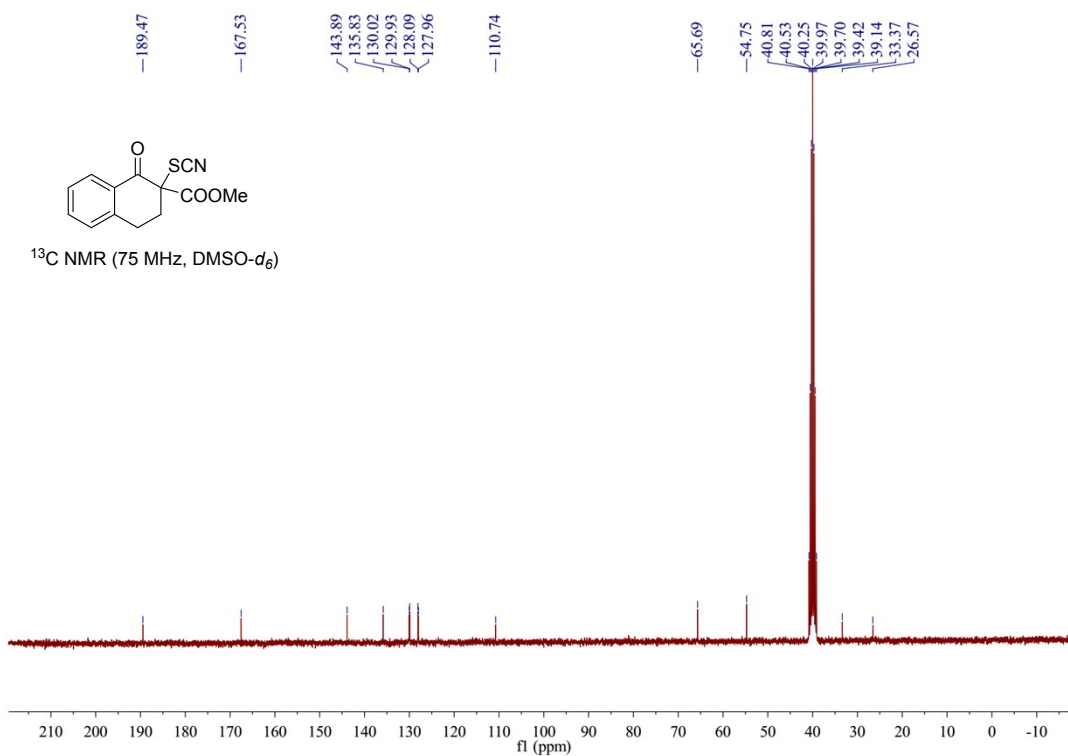

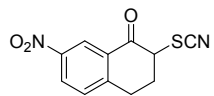

<sup>1</sup>H NMR (300 MHz, CDCl<sub>3</sub>)

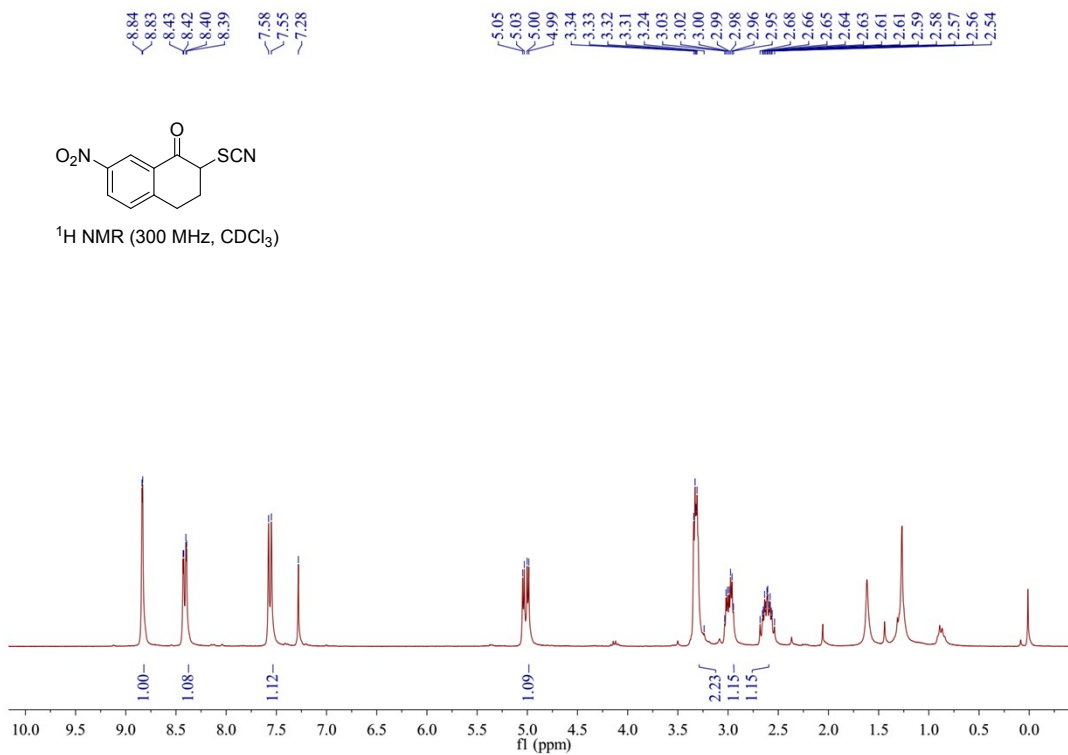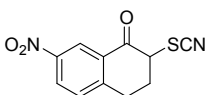

<sup>13</sup>C NMR (75 MHz, CDCl<sub>3</sub>)

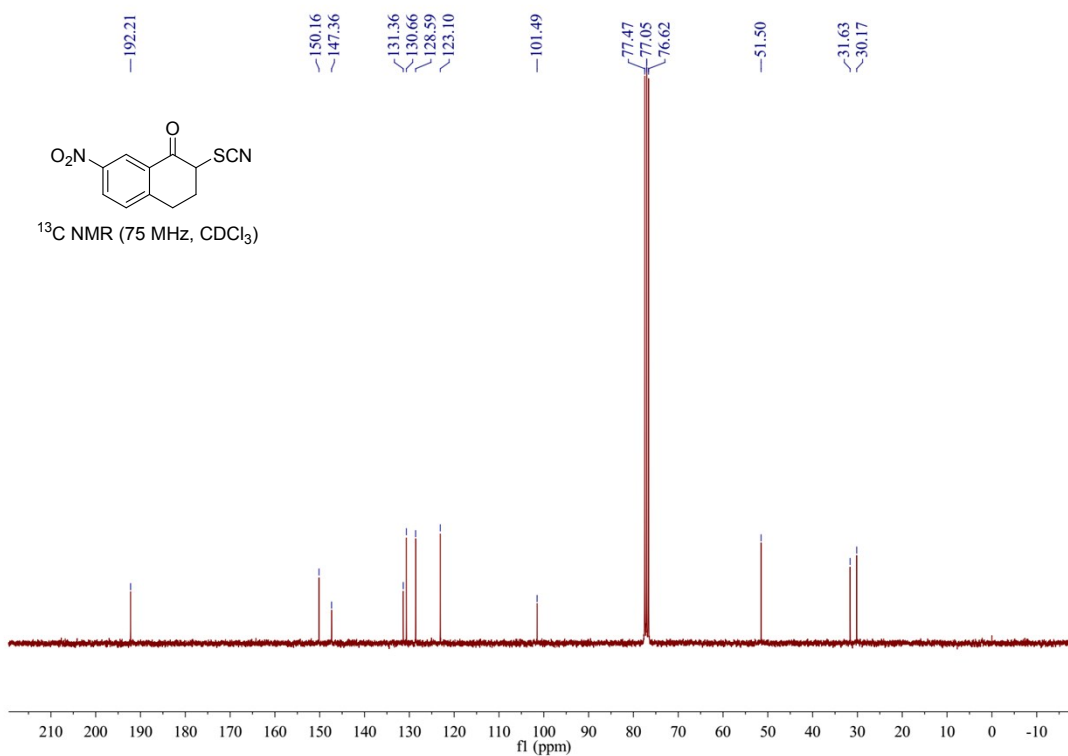

Supplement: c9qo00358d1.pdf [file c9qo00358d1.pdf]
